# Supplementary material for: Hydrogen Bonding in the Dimer and Monohydrate of 2-Adamantanol: A Test Case for Dispersion-Corrected Density Functional Methods
Source: MDPI journal article supplement (doi:10.3390/molecules27082584), 2022-04-17
Supplement: s1 [file s1]

# Hydrogen Bonding in the Dimer and Monohydrate of 2-Adamantanol: A Test Case for Dispersion-Corrected Density Functionals

## SUPPORTING INFORMATION

Marcos Juanes <sup>1</sup>, Rizalina Tama Saragi <sup>1</sup>, Cristóbal Pérez <sup>1</sup>, Luca Evangelisti <sup>2</sup>,  
Lourdes Enríquez <sup>3</sup>, Martín Jaraíz <sup>3</sup> and Alberto Lesarri <sup>1,\*</sup>

<sup>1</sup> Departamento de Química Física y Química Inorgánica, Facultad de Ciencias - I.U. CINQUIMA, Universidad de Valladolid, Paseo de Belén, 7, 47011 Valladolid (Spain)

<sup>2</sup> Dipartimento di Chimica “G. Ciamician”, Università di Bologna, Via Selmi 2, 40126 Bologna (Italy)

<sup>3</sup> Departamento de Electrónica, Escuela de Ingeniería de Telecomunicaciones, Universidad de Valladolid, Paseo de Belén, 15, 47011 Valladolid (Spain)

\* Correspondence: alberto.lesarri@uva.es

## LIST OF SUPPORTING FIGURES AND TABLES

**Figure S1.** 3D-rotatable image of isomer 1 of the 2-adamantanol dimer (B3LYP-D3(BJ)/def2-TZVP).

**Figure S2.** 3D-rotatable image of isomer 2 of the 2-adamantanol dimer (B3LYP-D3(BJ)/def2-TZVP).

**Figure S3.** Interconversion barrier between isomers 1 (left) and 2 (right) of the 2-adamantanol dimer, using GRRM/IRC at the B3LYP-D3/6-31g(d) level. Reoptimization of the minima and transition states with B3LYP-D3/def2-TZVP gives barriers of 2.4 and 3.6 kJ mol<sup>-1</sup>.

**Figure S4.** Interconversion barrier between isomers 1 (left) and 4 (right) of the 2-adamantanol dimer, using GRRM/IRC at the B3LYP-D3/6-31g(d) level. Reoptimization of the minima and transition states with B3LYP-D3/def2-TZVP gives barriers of 3.1-4.4 kJ mol<sup>-1</sup>.

**Table S1.** Rotational parameters of 2-adamantanol and comparison with the B3LYP-D3(BJ)/def2-TZVP predictions.

**Table S2.** Rotational transitions of the observed *gauche* conformer of 2-adamantanol (*Freq*) and differences between observed and calculated transitions (*o-c*) for the fit of Table 1.

**Table S3.** Rotational parameters of the 2-adamantanol-water dimer and comparison with the B3LYP-D3(BJ)/def2-TZVP predictions.

**Table S4.** Rotational transitions of the 2-adamantanol-water monohydrate (*Freq.*) and differences between observed and calculated transitions (*o-c*) for the fit of Table 2.

**Table S5.** Rotational transitions of isomer 1 of the 2-adamantanol dimer (*Freq.*) and differences between observed and calculated transitions (*o-c*) for the fit of Table 3.

**Table S6.** Rotational transitions of isomer 2 of the 2-adamantanol dimer (*Freq.*) and differences between observed and calculated transitions (*o-c*) for the fit of Table 3.

**Table S7.** Comparison of the structural and energetic results for the two lowest-lying isomers of the 2-adamantanol dimer using B3LYP-D3(BJ), CAM-B3LYP-D3(BJ) and wB97XD (a def2-TZVP basis set as used in all cases). The experimental results correspond to the fit of Table 3.

**Table S8.** Relative intensity measurements for a set of  $^aR$  rotational transitions of isomers 1 and 2 of the 2-adamantanol dimer. The population ratio was calculated with the B3LYP-D3(BJ) electric dipole moments of Table 3.

**Table S9.** Atomic coordinates for isomer 1 of the 2-adamantanol dimer in the principal inertial axes system (B3LYP-D3(BJ)/def2-TZVP).

**Table S10.** Atomic coordinates for isomer 2 of the 2-adamantanol dimer in the principal inertial axes system (B3LYP-D3(BJ)/def2-TZVP).

**Figure S1.** 3D-rotatable image of isomer 1 of the 2-adamantanol dimer (B3LYP-D3(BJ)/def2-TZVP).

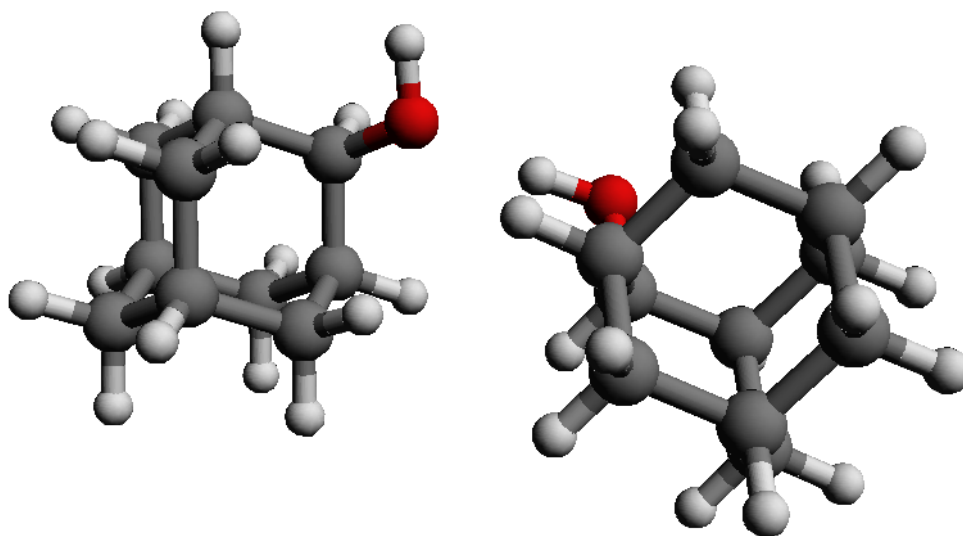

**Figure S2.** 3D-rotatable image of isomer 2 of the 2-adamantanol dimer (B3LYP-D3(BJ)/def2-TZVP).

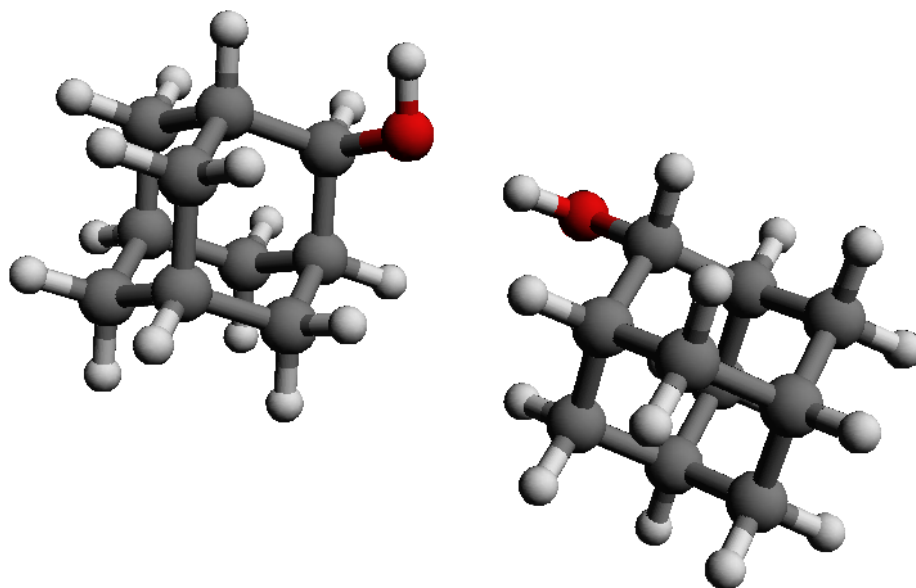

**Figure S3.** Interconversion barrier between isomers 1 (left) and 2 (right) of the 2-adamantanol dimer, using GRRM/IRC at the B3LYP-D3/6-31g(d) level. Reoptimization of the minima and transition states with B3LYP-D3/def2-TZVP gives barriers of 2.4 and 3.6 kJ mol<sup>-1</sup>.

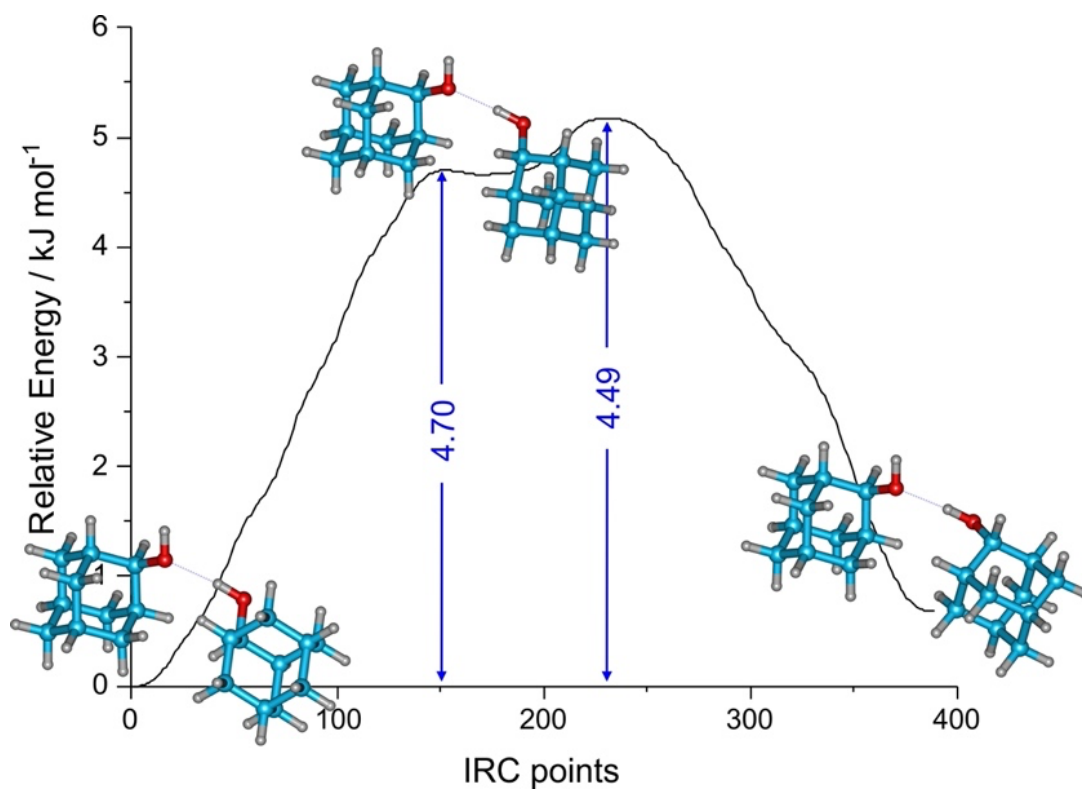

**Figure S4.** Interconversion barrier between isomers 1 (left) and 4 (right) of the 2-adamantanol dimer, using GRRM/IRC at the B3LYP-D3/6-31g(d) level. Reoptimization of the minima and transition states with B3LYP-D3/def2-TZVP gives barriers of 3.1-4.4 kJ mol<sup>-1</sup>.

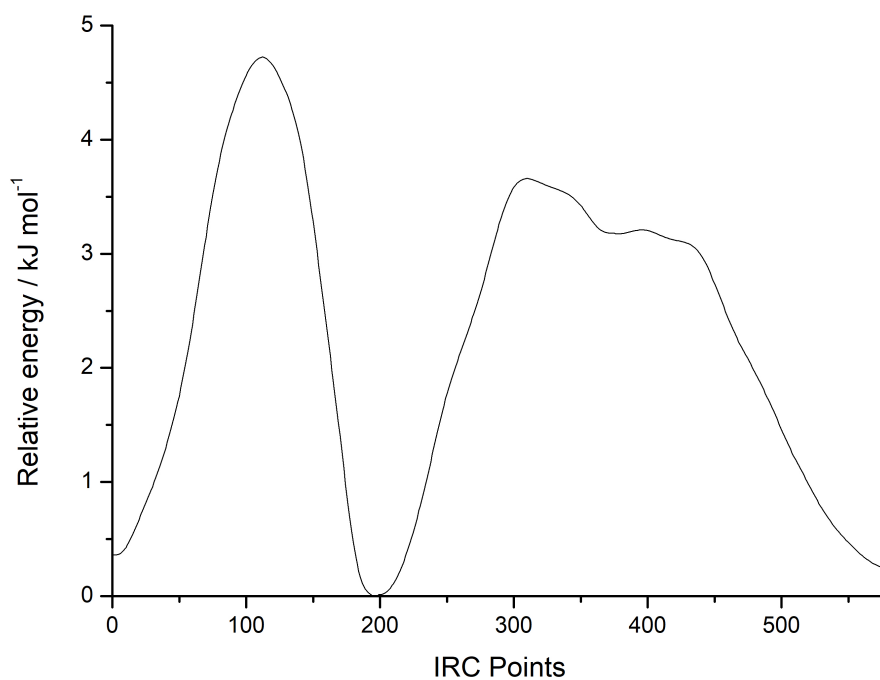

**Table S1.** Rotational parameters of 2-adamantanol and comparison with the B3LYP-D3(BJ)/def2-TZVP predictions.

|                                               | Experiment                 | B3LYP-D3(BJ)  |             |
|-----------------------------------------------|----------------------------|---------------|-------------|
|                                               | <i>Gauche</i>              | <i>Gauche</i> | <i>Anti</i> |
| $A / \text{MHz}^a$                            | 1680.6888(30) <sup>d</sup> | 1688.38       | 1686.04     |
| $B / \text{MHz}$                              | 1197.8532(20)              | 1201.19       | 1194.68     |
| $C / \text{MHz}$                              | 1195.3429(18)              | 1199.03       | 1189.83     |
| $\kappa$                                      | -0.990(4)                  | -0.991        | -0.980      |
| $D_J / \text{kHz}$                            | [ 0.] <sup>e</sup>         | 0.0321        | 0.0312      |
| $D_{JK} / \text{kHz}$                         | 0.280(89)                  | 0.0314        | 0.0274      |
| $D_K / \text{kHz}$                            | -0.204(61)                 | -0.0105       | -0.0056     |
| $d_1 / \text{kHz}$                            | [ 0.]                      | 0.0009        | 0.0008      |
| $d_2 / \text{kHz}$                            | [ 0.]                      | 0.0005        | 0.0006      |
| $ \mu_a  / \text{D}$                          |                            | 0.50          | 1.74        |
| $ \mu_b  / \text{D}$                          |                            | 0.90          | 0.72        |
| $ \mu_c  / \text{D}$                          |                            | 0.97          | 0.00        |
| $\Delta E_{ZPE} / \text{kJ mol}^{-1b}$        |                            | 0.00          | 2.05        |
| $\Delta G_{298\text{K}} / \text{kJ mol}^{-1}$ |                            | 0.00          | 1.80        |
| $N^c$                                         | 25                         |               |             |
| $\sigma / \text{kHz}$                         | 7.5                        |               |             |

<sup>a</sup>Rotational constants ( $A$ ,  $B$ ,  $C$ ), Ray's asymmetry parameter ( $\kappa = (2B-A-C)/(A-C)$ ), Watson's  $S$ -reduction centrifugal distortion constants ( $D_J$ ,  $D_{JK}$ ,  $D_K$ ,  $d_1$ ,  $d_2$ ) and electric dipole moments ( $\mu_\alpha$ ,  $\alpha = a, b, c$ ). <sup>b</sup>Relative electronic energy with zero-point correction ( $\Delta E_{ZPE}$ ) and Gibbs energy ( $\Delta G$ , 298K, 1 atm). <sup>c</sup>Number of fitted transitions and rms deviation of the fit. <sup>d</sup>Standard errors in parentheses in units of the last digit. <sup>e</sup>Parameters in square brackets were fixed to zero.



**Table S2.** Rotational transitions of the observed *gauche* conformer of 2-adamantanol (*Freq*) and differences between observed and calculated transitions (*o-c*) for the fit of Table 1.

| $J'$ | $K_{-1}'$ | $K_{+1}'$ | $J''$ | $K_{-1}''$ | $K_{+1}''$ | <i>Freq.</i> / MHz | <i>o-c</i> / MHz |
|------|-----------|-----------|-------|------------|------------|--------------------|------------------|
| 1    | 0         | 1         | 0     | 0          | 0          | 2393.1875          | -0.0086          |
| 7    | 3         | 4         | 7     | 2          | 5          | 2419.5000          | -0.0048          |
| 6    | 3         | 3         | 6     | 2          | 4          | 2419.9250          | 0.0129           |
| 5    | 3         | 2         | 5     | 2          | 3          | 2420.1625          | -0.0096          |
| 1    | 1         | 1         | 0     | 0          | 0          | 2876.0375          | 0.0060           |
| 4    | 4         | 0         | 4     | 3          | 1          | 3388.6125          | -0.0010          |
| 2    | 0         | 2         | 1     | 1          | 1          | 4303.5500          | 0.0026           |
| 5    | 5         | 1         | 5     | 4          | 1          | 4356.7875          | -0.0086          |
| 2    | 1         | 2         | 1     | 1          | 1          | 4783.8750          | -0.0060          |
| 2    | 0         | 2         | 1     | 0          | 1          | 4786.3875          | 0.0048           |
| 2    | 1         | 1         | 1     | 1          | 0          | 4788.9125          | 0.0110           |
| 2    | 1         | 2         | 1     | 0          | 1          | 5266.7125          | -0.0037          |
| 6    | 6         | 1         | 6     | 5          | 1          | 5324.9750          | -0.0077          |
| 6    | 6         | 0         | 6     | 5          | 1          | 5324.9750          | -0.0077          |
| 6    | 6         | 1         | 6     | 5          | 2          | 5324.9750          | -0.0077          |
| 7    | 6         | 2         | 7     | 5          | 3          | 5324.9750          | 0.0426           |
| 3    | 1         | 3         | 2     | 2          | 0          | 5719.7625          | -0.0075          |
| 3    | 1         | 2         | 2     | 2          | 1          | 5734.8250          | -0.0162          |
| 2    | 2         | 1         | 1     | 1          | 0          | 6237.4000          | -0.0063          |
| 2    | 2         | 0         | 1     | 1          | 1          | 6239.9250          | -0.0013          |
| 3    | 0         | 3         | 2     | 1          | 2          | 6699.2250          | 0.0091           |
| 3    | 1         | 3         | 2     | 1          | 2          | 7175.8250          | 0.0095           |
| 3    | 0         | 3         | 2     | 0          | 2          | 7179.5500          | 0.0004           |
| 3    | 1         | 2         | 2     | 1          | 1          | 7183.3500          | 0.0038           |
| 3    | 1         | 3         | 2     | 0          | 2          | 7656.1500          | 0.0009           |

**Table S3.** Rotational parameters of the 2-adamantanol-water dimer and comparison with the B3LYP-D3(BJ)/def2-TZVP predictions.

|                                               | Experiment                 | B3LYP-D3(BJ)     |                |                  |                |
|-----------------------------------------------|----------------------------|------------------|----------------|------------------|----------------|
|                                               |                            | <i>Gauche-Wd</i> | <i>Anti-Wd</i> | <i>Gauche-Wa</i> | <i>Anti-Wa</i> |
| $A / \text{MHz}^a$                            | 1511.8092(12) <sup>d</sup> | 1530.18          | 1525.44        | 1556.88          | 1477.91        |
| $B / \text{MHz}$                              | 690.17508(75)              | 685.53           | 689.11         | 655.05           | 738.14         |
| $C / \text{MHz}$                              | 662.22912(72)              | 659.98           | 662.32         | 635.87           | 695.64         |
| $\kappa$                                      | -0.934(1)                  | -0.941           | -0.938         | -0.958           | -0.891         |
| $D_J / \text{kHz}$                            | 0.3846(79)                 | 0.1712           | 0.1477         | 0.2584           | 0.1303         |
| $D_{JK} / \text{kHz}$                         | 1.732(24)                  | 2.0706           | 1.0529         | 0.2536           | 0.1365         |
| $D_K / \text{kHz}$                            | -1.721(36)                 | -2.0364          | -1.0312        | -0.1456          | -0.0965        |
| $d_1 / \text{kHz}$                            | -0.0366(65)                | -0.0185          | -0.0160        | -0.0301          | -0.0175        |
| $d_2 / \text{kHz}$                            | 0.0067(13)                 | 0.0107           | 0.0062         | 0.0021           | 0.0025         |
| $ \mu_a  / \text{D}$                          |                            | 2.78             | 2.27           | 2.77             | 1.58           |
| $ \mu_b  / \text{D}$                          |                            | 1.23             | 1.21           | 1.22             | 0.82           |
| $ \mu_c  / \text{D}$                          |                            | 0.45             | 0.34           | 0.49             | 0.00           |
| $\Delta E_{ZPE} / \text{kJ mol}^{-1b}$        |                            | 0.00             | 1.46           | 4.12             | 6.65           |
| $\Delta G_{298\text{K}} / \text{kJ mol}^{-1}$ |                            | 0.00             | 1.63           | 1.62             | 5.38           |
| $\Delta E_c / \text{kJ mol}^{-1}$             |                            | -27.66           | -29.25         | -23.47           | -22.80         |
| $N^c$                                         | 60                         |                  |                |                  |                |
| $\sigma / \text{kHz}$                         | 10.6                       |                  |                |                  |                |

<sup>a</sup>Rotational constants ( $A$ ,  $B$ ,  $C$ ), Ray's asymmetry parameter ( $\kappa = (2B-A-C)/(A-C)$ ), Watson's S-reduction centrifugal distortion constants ( $D_J$ ,  $D_{JK}$ ,  $D_K$ ,  $d_1$ ,  $d_2$ ) and electric dipole moments ( $\mu_\alpha$ ,  $\alpha = a, b, c$ ). <sup>b</sup>Relative electronic energy with zero-point correction ( $\Delta E_{ZPE}$ ), Gibbs energy ( $\Delta G$ , 298K, 1 atm) and complexation energy ( $\Delta E_c$ ). <sup>c</sup>Number of fitted transitions and rms deviation of the fit. <sup>d</sup>Standard errors in parentheses in units of the last digit.

**Table S4.** Rotational transitions of the 2-adamantanol-water monohydrate (*Freq.*) and differences between observed and calculated transitions (*o-c*) for the fit of Table 2.

| $J'$ | $K_{-1}'$ | $K_{+1}'$ | $J''$ | $K_{-1}''$ | $K_{+1}''$ | <i>Freq.</i> / MHz | <i>o-c</i> / MHz |
|------|-----------|-----------|-------|------------|------------|--------------------|------------------|
| 4    | 2         | 2         | 4     | 1          | 3          | 2378.8375          | -0.0074          |
| 3    | 2         | 2         | 3     | 1          | 3          | 2591.0375          | -0.0118          |
| 4    | 2         | 3         | 4     | 1          | 4          | 2647.7125          | 0.0000           |
| 2    | 1         | 2         | 1     | 1          | 1          | 2676.8500          | 0.0056           |
| 2    | 0         | 2         | 1     | 0          | 1          | 2704.1000          | 0.0047           |
| 5    | 2         | 4         | 5     | 1          | 5          | 2718.9125          | 0.0137           |
| 2    | 1         | 1         | 1     | 1          | 0          | 2732.7500          | 0.0160           |
| 6    | 2         | 5         | 6     | 1          | 6          | 2804.7750          | -0.0137          |
| 3    | 0         | 3         | 2     | 1          | 2          | 3259.9875          | -0.0018          |
| 2    | 1         | 2         | 1     | 0          | 1          | 3498.4750          | -0.0019          |
| 3    | 1         | 3         | 2     | 1          | 2          | 4014.8125          | -0.0005          |
| 3    | 0         | 3         | 2     | 0          | 2          | 4054.3750          | 0.0039           |
| 3    | 2         | 2         | 2     | 2          | 1          | 4057.1375          | 0.0086           |
| 3    | 2         | 1         | 2     | 2          | 0          | 4059.9375          | 0.0073           |
| 8    | 3         | 5         | 8     | 2          | 6          | 4080.0000          | 0.0041           |
| 3    | 1         | 2         | 2     | 1          | 1          | 4098.6375          | 0.0054           |
| 7    | 3         | 4         | 7     | 2          | 5          | 4117.2000          | 0.0029           |
| 6    | 3         | 3         | 6     | 2          | 4          | 4143.2125          | 0.0171           |
| 5    | 3         | 2         | 5     | 2          | 3          | 4160.0375          | 0.0095           |
| 4    | 3         | 1         | 4     | 2          | 2          | 4169.9250          | 0.0103           |
| 5    | 3         | 3         | 5     | 2          | 4          | 4184.0875          | -0.0039          |
| 6    | 3         | 4         | 6     | 2          | 5          | 4190.7000          | 0.0052           |
| 7    | 3         | 5         | 7     | 2          | 6          | 4201.1625          | -0.0090          |
| 8    | 3         | 6         | 8     | 2          | 7          | 4216.6625          | 0.0080           |
| 9    | 3         | 7         | 9     | 2          | 8          | 4238.3500          | 0.0112           |
| 5    | 1         | 4         | 4     | 2          | 3          | 4460.1375          | 0.0211           |
| 4    | 0         | 4         | 3     | 1          | 3          | 4647.7000          | -0.0143          |
| 3    | 1         | 3         | 2     | 0          | 2          | 4809.1875          | -0.0072          |
| 2    | 2         | 1         | 1     | 1          | 0          | 5197.6250          | -0.0072          |
| 2    | 2         | 0         | 1     | 1          | 1          | 5226.2750          | -0.0040          |
| 7    | 2         | 6         | 6     | 3          | 3          | 5269.1500          | 0.0127           |
| 6    | 1         | 6         | 5     | 2          | 3          | 5281.7000          | 0.0067           |
| 4    | 1         | 4         | 3     | 1          | 3          | 5352.2625          | 0.0094           |
| 7    | 2         | 5         | 6     | 3          | 4          | 5356.3250          | -0.0097          |
| 4    | 0         | 4         | 3     | 0          | 3          | 5402.5375          | -0.0005          |
| 4    | 2         | 3         | 3     | 2          | 2          | 5408.9250          | 0.0087           |
| 4    | 3         | 2         | 3     | 3          | 1          | 5410.7875          | 0.0250           |
| 4    | 3         | 1         | 3     | 3          | 0          | 5410.7875          | -0.0410          |
| 4    | 2         | 2         | 3     | 2          | 1          | 5415.9125          | 0.0129           |
| 4    | 1         | 3         | 3     | 1          | 2          | 5463.9625          | 0.0103           |

|   |   |   |   |   |   |           |         |
|---|---|---|---|---|---|-----------|---------|
| 6 | 1 | 5 | 5 | 2 | 4 | 5891.8875 | 0.0091  |
| 5 | 0 | 5 | 4 | 1 | 4 | 6043.4000 | -0.0097 |
| 4 | 1 | 4 | 3 | 0 | 3 | 6107.0750 | -0.0017 |
| 7 | 1 | 7 | 6 | 2 | 4 | 6506.7875 | 0.0002  |
| 3 | 2 | 2 | 2 | 1 | 1 | 6522.0250 | -0.0021 |
| 3 | 2 | 1 | 2 | 1 | 2 | 6609.3750 | 0.0101  |
| 5 | 1 | 5 | 4 | 1 | 4 | 6689.0250 | 0.0118  |
| 5 | 0 | 5 | 4 | 0 | 4 | 6747.9500 | 0.0015  |
| 5 | 2 | 4 | 4 | 2 | 3 | 6760.2000 | 0.0006  |
| 5 | 4 | 1 | 4 | 4 | 0 | 6763.0875 | -0.0219 |
| 5 | 3 | 3 | 4 | 3 | 2 | 6763.9625 | -0.0048 |
| 5 | 3 | 2 | 4 | 3 | 1 | 6764.1875 | -0.0106 |
| 5 | 2 | 3 | 4 | 2 | 2 | 6774.0875 | 0.0025  |
| 5 | 1 | 4 | 4 | 1 | 3 | 6828.4500 | -0.0255 |
| 7 | 1 | 6 | 6 | 2 | 5 | 7335.1750 | 0.0097  |
| 5 | 1 | 5 | 4 | 0 | 4 | 7393.5500 | -0.0018 |
| 6 | 0 | 6 | 5 | 1 | 5 | 7444.4250 | -0.0202 |
| 7 | 5 | 3 | 7 | 4 | 4 | 7517.1375 | -0.0221 |
| 6 | 5 | 2 | 6 | 4 | 3 | 7518.3875 | 0.0160  |
| 4 | 2 | 3 | 3 | 1 | 2 | 7832.3000 | -0.0113 |

**Table S5.** Rotational transitions of isomer 1 of the 2-adamantanol dimer (*Freq.*) and differences between observed and calculated transitions (*o-c*) for the fit of Table 3.

| $J'$ | $K_{-1}'$ | $K_{+1}'$ | $J''$ | $K_{-1}''$ | $K_{+1}''$ | <i>Freq.</i> / MHz | <i>o-c</i> / MHz |
|------|-----------|-----------|-------|------------|------------|--------------------|------------------|
| 8    | 1         | 8         | 7     | 1          | 7          | 2175.3250          | -0.0146          |
| 8    | 0         | 8         | 7     | 0          | 7          | 2187.1250          | -0.0096          |
| 8    | 2         | 7         | 7     | 2          | 6          | 2188.0875          | 0.0000           |
| 8    | 3         | 5         | 7     | 3          | 4          | 2188.3875          | -0.0276          |
| 8    | 2         | 6         | 7     | 2          | 5          | 2189.2000          | -0.0016          |
| 8    | 1         | 7         | 7     | 1          | 6          | 2200.6375          | 0.0105           |
| 9    | 1         | 9         | 8     | 1          | 8          | 2447.1625          | -0.0090          |
| 9    | 0         | 9         | 8     | 0          | 8          | 2460.1875          | 0.0015           |
| 9    | 2         | 8         | 8     | 2          | 7          | 2461.5375          | -0.0005          |
| 9    | 3         | 7         | 8     | 3          | 6          | 2462.0000          | 0.0075           |
| 9    | 3         | 6         | 8     | 3          | 5          | 2462.0000          | -0.0085          |
| 9    | 2         | 7         | 8     | 2          | 6          | 2463.1250          | -0.0029          |
| 9    | 1         | 8         | 8     | 1          | 7          | 2475.6375          | 0.0239           |
| 10   | 1         | 10        | 9     | 1          | 9          | 2718.9625          | -0.0117          |
| 10   | 0         | 10        | 9     | 0          | 9          | 2733.1250          | 0.0062           |
| 10   | 2         | 9         | 9     | 2          | 8          | 2734.9625          | -0.0047          |
| 10   | 4         | 7         | 9     | 4          | 6          | 2735.4750          | -0.0018          |
| 10   | 3         | 8         | 9     | 3          | 7          | 2735.6125          | 0.0224           |
| 10   | 3         | 7         | 9     | 3          | 6          | 2735.6125          | -0.0051          |
| 10   | 2         | 8         | 9     | 2          | 7          | 2737.1500          | -0.0001          |
| 10   | 1         | 9         | 9     | 1          | 8          | 2750.5750          | 0.0083           |
| 11   | 1         | 11        | 10    | 1          | 10         | 2990.7375          | -0.0075          |
| 11   | 0         | 11        | 10    | 0          | 10         | 3005.9250          | 0.0039           |
| 11   | 2         | 10        | 10    | 2          | 9          | 3008.3625          | -0.0103          |
| 11   | 4         | 8         | 10    | 4          | 7          | 3009.0375          | -0.0151          |
| 11   | 4         | 7         | 10    | 4          | 6          | 3009.0375          | -0.0154          |
| 11   | 3         | 9         | 10    | 3          | 8          | 3009.2750          | 0.0751           |
| 11   | 3         | 8         | 10    | 3          | 7          | 3009.2750          | 0.0302           |
| 11   | 2         | 9         | 10    | 2          | 8          | 3011.2750          | -0.0025          |
| 11   | 1         | 10        | 10    | 1          | 9          | 3025.4875          | 0.0053           |
| 12   | 1         | 12        | 11    | 1          | 11         | 3262.4625          | -0.0187          |
| 12   | 0         | 12        | 11    | 0          | 11         | 3278.5875          | 0.0056           |
| 12   | 2         | 11        | 11    | 2          | 10         | 3281.7625          | 0.0100           |
| 12   | 4         | 8         | 11    | 4          | 7          | 3282.6250          | -0.0119          |
| 12   | 3         | 10        | 11    | 3          | 9          | 3282.8375          | 0.0149           |
| 12   | 3         | 9         | 11    | 3          | 8          | 3282.8375          | -0.0548          |
| 12   | 2         | 10        | 11    | 2          | 9          | 3285.5125          | -0.0060          |
| 12   | 1         | 11        | 11    | 1          | 10         | 3300.3481          | -0.0074          |
| 13   | 1         | 13        | 12    | 1          | 12         | 3534.1875          | 0.0068           |
| 13   | 0         | 13        | 12    | 0          | 12         | 3551.1000          | 0.0089           |

---

|    |   |    |    |   |    |           |         |
|----|---|----|----|---|----|-----------|---------|
| 13 | 2 | 12 | 12 | 2 | 11 | 3555.1000 | -0.0036 |
| 13 | 6 | 8  | 12 | 6 | 6  | 3556.1000 | 0.0471  |
| 13 | 4 | 10 | 12 | 4 | 9  | 3556.2500 | 0.0209  |
| 13 | 4 | 9  | 12 | 4 | 8  | 3556.2500 | 0.0201  |
| 13 | 3 | 11 | 12 | 3 | 10 | 3556.4500 | -0.0084 |
| 13 | 3 | 10 | 12 | 3 | 9  | 3556.5750 | 0.0119  |
| 13 | 2 | 11 | 12 | 2 | 10 | 3559.8750 | -0.0059 |
| 13 | 1 | 12 | 12 | 1 | 11 | 3575.1750 | -0.0071 |
| 14 | 1 | 14 | 13 | 1 | 13 | 3805.8375 | -0.0035 |
| 14 | 0 | 14 | 13 | 0 | 13 | 3823.4250 | -0.0146 |
| 14 | 2 | 13 | 13 | 2 | 12 | 3828.4250 | 0.0008  |
| 14 | 5 | 9  | 13 | 5 | 8  | 3829.6625 | -0.0214 |
| 14 | 4 | 10 | 13 | 4 | 9  | 3829.8250 | -0.0074 |
| 14 | 3 | 12 | 13 | 3 | 11 | 3830.1000 | -0.0077 |
| 14 | 3 | 11 | 13 | 3 | 10 | 3830.2625 | 0.0026  |
| 14 | 2 | 12 | 13 | 2 | 11 | 3834.3750 | 0.0041  |
| 14 | 1 | 13 | 13 | 1 | 12 | 3849.9625 | 0.0054  |
| 12 | 1 | 11 | 11 | 0 | 11 | 3976.2000 | 0.0003  |
| 15 | 1 | 15 | 14 | 1 | 14 | 4077.4750 | 0.0146  |
| 15 | 0 | 15 | 14 | 0 | 14 | 4095.6375 | 0.0171  |
| 15 | 2 | 14 | 14 | 2 | 13 | 4101.7125 | 0.0009  |
| 15 | 5 | 10 | 14 | 5 | 9  | 4103.2375 | -0.0242 |
| 15 | 4 | 11 | 14 | 4 | 10 | 4103.4375 | -0.0078 |
| 15 | 3 | 13 | 14 | 3 | 12 | 4103.7750 | 0.0044  |
| 15 | 3 | 12 | 14 | 3 | 11 | 4103.9875 | 0.0016  |
| 15 | 2 | 13 | 14 | 2 | 12 | 4109.0125 | 0.0192  |
| 15 | 1 | 14 | 14 | 1 | 13 | 4124.6750 | -0.0002 |
| 16 | 1 | 16 | 15 | 1 | 15 | 4349.0250 | -0.0118 |
| 16 | 0 | 16 | 15 | 0 | 15 | 4367.6250 | -0.0022 |
| 16 | 2 | 15 | 15 | 2 | 14 | 4374.9625 | -0.0012 |
| 16 | 5 | 11 | 15 | 5 | 10 | 4376.8625 | 0.0169  |
| 16 | 4 | 12 | 15 | 4 | 11 | 4377.0750 | 0.0053  |
| 16 | 3 | 14 | 15 | 3 | 13 | 4377.4375 | -0.0091 |
| 16 | 3 | 13 | 15 | 3 | 12 | 4377.7500 | 0.0056  |
| 16 | 2 | 14 | 15 | 2 | 13 | 4383.7500 | -0.0011 |
| 16 | 1 | 15 | 15 | 1 | 14 | 4399.3375 | 0.0063  |
| 17 | 1 | 17 | 16 | 1 | 16 | 4620.5625 | -0.0065 |
| 17 | 0 | 17 | 16 | 0 | 16 | 4639.4500 | -0.0067 |
| 17 | 2 | 16 | 16 | 2 | 15 | 4648.1625 | -0.0157 |
| 17 | 5 | 12 | 16 | 5 | 11 | 4650.4500 | 0.0141  |
| 17 | 4 | 13 | 16 | 4 | 12 | 4650.6875 | -0.0184 |
| 17 | 3 | 15 | 16 | 3 | 14 | 4651.1375 | 0.0019  |
| 17 | 3 | 14 | 16 | 3 | 13 | 4651.5375 | -0.0016 |
| 17 | 2 | 15 | 16 | 2 | 14 | 4658.6500 | 0.0040  |
| 17 | 1 | 16 | 16 | 1 | 15 | 4673.9125 | -0.0069 |
| 18 | 1 | 18 | 17 | 1 | 17 | 4892.0500 | -0.0053 |

---

---

|    |   |    |    |   |    |           |         |
|----|---|----|----|---|----|-----------|---------|
| 18 | 0 | 18 | 17 | 0 | 17 | 4911.1000 | -0.0070 |
| 18 | 2 | 17 | 17 | 2 | 16 | 4921.3500 | -0.0028 |
| 18 | 5 | 14 | 17 | 5 | 13 | 4924.0500 | 0.0172  |
| 18 | 4 | 14 | 17 | 4 | 13 | 4924.3500 | -0.0051 |
| 18 | 3 | 16 | 17 | 3 | 15 | 4924.8250 | -0.0117 |
| 18 | 3 | 15 | 17 | 3 | 14 | 4925.3875 | 0.0133  |
| 18 | 2 | 16 | 17 | 2 | 15 | 4933.7000 | 0.0236  |
| 18 | 1 | 17 | 17 | 1 | 16 | 4948.4250 | -0.0090 |
| 19 | 1 | 19 | 18 | 1 | 18 | 5163.5250 | 0.0301  |
| 19 | 0 | 19 | 18 | 0 | 18 | 5182.5750 | -0.0038 |
| 19 | 2 | 18 | 18 | 2 | 17 | 5194.4875 | 0.0021  |
| 19 | 5 | 15 | 18 | 5 | 14 | 5197.6375 | 0.0005  |
| 19 | 4 | 15 | 18 | 4 | 14 | 5198.0125 | -0.0057 |
| 19 | 3 | 17 | 18 | 3 | 16 | 5198.5250 | -0.0243 |
| 19 | 3 | 16 | 18 | 3 | 15 | 5199.2500 | -0.0035 |
| 19 | 2 | 17 | 18 | 2 | 16 | 5208.8500 | 0.0106  |
| 19 | 1 | 18 | 18 | 1 | 17 | 5222.8625 | -0.0062 |
| 20 | 1 | 20 | 19 | 1 | 19 | 5434.9000 | 0.0133  |
| 20 | 0 | 20 | 19 | 0 | 19 | 5453.8750 | 0.0000  |
| 20 | 2 | 19 | 19 | 2 | 18 | 5467.6000 | 0.0266  |
| 20 | 5 | 15 | 19 | 5 | 14 | 5471.2500 | 0.0010  |
| 20 | 4 | 16 | 19 | 4 | 15 | 5471.6750 | -0.0210 |
| 20 | 3 | 18 | 19 | 3 | 17 | 5472.2750 | 0.0027  |
| 20 | 3 | 17 | 19 | 3 | 16 | 5473.1875 | 0.0057  |
| 20 | 2 | 18 | 19 | 2 | 17 | 5484.1250 | -0.0039 |
| 20 | 1 | 19 | 19 | 1 | 18 | 5497.2250 | 0.0079  |
| 21 | 1 | 21 | 20 | 1 | 20 | 5706.2375 | 0.0075  |
| 21 | 0 | 21 | 20 | 0 | 20 | 5724.9875 | -0.0133 |
| 21 | 2 | 20 | 20 | 2 | 19 | 5740.5875 | -0.0274 |
| 21 | 5 | 16 | 20 | 5 | 15 | 5744.8625 | -0.0063 |
| 21 | 4 | 18 | 20 | 4 | 17 | 5745.3500 | -0.0135 |
| 21 | 4 | 17 | 20 | 4 | 16 | 5745.3500 | -0.0397 |
| 21 | 3 | 19 | 20 | 3 | 18 | 5746.0125 | 0.0083  |
| 21 | 3 | 18 | 20 | 3 | 17 | 5747.1750 | 0.0113  |
| 21 | 2 | 19 | 20 | 2 | 18 | 5759.5250 | -0.0123 |
| 21 | 1 | 20 | 20 | 1 | 19 | 5771.4750 | 0.0027  |
| 22 | 1 | 22 | 21 | 1 | 21 | 5977.5375 | 0.0131  |
| 22 | 0 | 22 | 21 | 0 | 21 | 5995.9750 | 0.0111  |

---

**Table S6.** Rotational transitions of isomer 2 of the 2-adamantanol dimer (*Freq.*) and differences between observed and calculated transitions (*o-c*) for the fit of Table 3.

| $J'$ | $K_{-1}'$ | $K_{+1}'$ | $J''$ | $K_{-1}''$ | $K_{+1}''$ | <i>Freq.</i> / MHz | <i>o-c</i> / MHz |
|------|-----------|-----------|-------|------------|------------|--------------------|------------------|
| 8    | 1         | 8         | 7     | 1          | 7          | 2152.7250          | -0.0057          |
| 8    | 0         | 8         | 7     | 0          | 7          | 2164.1125          | 0.0051           |
| 8    | 2         | 7         | 7     | 2          | 6          | 2164.9750          | -0.0075          |
| 8    | 2         | 6         | 7     | 2          | 5          | 2166.0250          | 0.0180           |
| 8    | 1         | 7         | 7     | 1          | 6          | 2177.0500          | 0.0057           |
| 9    | 1         | 9         | 8     | 1          | 8          | 2421.7527          | 0.0086           |
| 9    | 0         | 9         | 8     | 0          | 8          | 2434.3000          | -0.0083          |
| 9    | 2         | 8         | 8     | 2          | 7          | 2435.5500          | -0.0005          |
| 9    | 3         | 6         | 8     | 3          | 5          | 2435.9625          | -0.0188          |
| 9    | 2         | 7         | 8     | 2          | 6          | 2437.0125          | 0.0000           |
| 9    | 1         | 8         | 8     | 1          | 7          | 2449.1000          | 0.0087           |
| 10   | 1         | 10        | 9     | 1          | 9          | 2690.7250          | -0.0056          |
| 10   | 0         | 10        | 9     | 0          | 9          | 2704.4000          | -0.0003          |
| 10   | 2         | 9         | 9     | 2          | 8          | 2706.1000          | 0.0007           |
| 10   | 4         | 7         | 9     | 4          | 6          | 2706.5625          | -0.0015          |
| 10   | 3         | 8         | 9     | 3          | 7          | 2706.6750          | 0.0042           |
| 10   | 3         | 7         | 9     | 3          | 6          | 2706.6750          | -0.0200          |
| 10   | 2         | 8         | 9     | 2          | 7          | 2708.1000          | -0.0067          |
| 10   | 1         | 9         | 9     | 1          | 8          | 2721.1000          | -0.0079          |
| 11   | 1         | 11        | 10    | 1          | 10         | 2959.6875          | -0.0005          |
| 11   | 0         | 11        | 10    | 0          | 10         | 2974.3750          | 0.0025           |
| 11   | 2         | 10        | 10    | 2          | 9          | 2976.6250          | -0.0014          |
| 11   | 3         | 9         | 10    | 3          | 8          | 2977.4375          | 0.0515           |
| 11   | 3         | 8         | 10    | 3          | 7          | 2977.4375          | 0.0120           |
| 11   | 2         | 9         | 10    | 2          | 8          | 2979.3000          | 0.0017           |
| 11   | 1         | 10        | 10    | 1          | 9          | 2993.1000          | 0.0096           |
| 12   | 1         | 12        | 11    | 1          | 11         | 3228.6125          | -0.0014          |
| 12   | 0         | 12        | 11    | 0          | 11         | 3244.2125          | -0.0017          |
| 12   | 2         | 11        | 11    | 2          | 10         | 3247.1250          | -0.0051          |
| 12   | 3         | 10        | 11    | 3          | 9          | 3248.1500          | 0.0365           |
| 12   | 3         | 9         | 11    | 3          | 8          | 3248.1500          | -0.0248          |
| 12   | 2         | 10        | 11    | 2          | 9          | 3250.6000          | 0.0048           |
| 12   | 1         | 11        | 11    | 1          | 10         | 3265.0500          | 0.0154           |
| 13   | 1         | 13        | 12    | 1          | 12         | 3497.5000          | -0.0061          |
| 13   | 0         | 13        | 12    | 0          | 12         | 3513.9250          | 0.0088           |
| 13   | 2         | 12        | 12    | 2          | 11         | 3517.6125          | 0.0045           |
| 13   | 4         | 9         | 12    | 4          | 8          | 3518.6500          | 0.0114           |
| 13   | 3         | 11        | 12    | 3          | 10         | 3518.9125          | 0.0588           |
| 13   | 3         | 10        | 12    | 3          | 9          | 3518.9125          | -0.0330          |
| 13   | 2         | 11        | 12    | 2          | 10         | 3522.0125          | 0.0079           |



---

|    |   |    |    |   |    |           |         |
|----|---|----|----|---|----|-----------|---------|
| 13 | 1 | 12 | 12 | 1 | 11 | 3536.9375 | 0.0013  |
| 14 | 1 | 14 | 13 | 1 | 13 | 3766.3500 | -0.0125 |
| 14 | 0 | 14 | 13 | 0 | 13 | 3783.4750 | 0.0050  |
| 14 | 2 | 13 | 13 | 2 | 12 | 3788.0500 | -0.0080 |
| 14 | 4 | 10 | 13 | 4 | 9  | 3789.3500 | 0.0025  |
| 14 | 3 | 12 | 13 | 3 | 11 | 3789.6000 | -0.0067 |
| 14 | 3 | 11 | 13 | 3 | 10 | 3789.7375 | -0.0029 |
| 14 | 2 | 12 | 13 | 2 | 11 | 3793.5250 | -0.0077 |
| 14 | 1 | 13 | 13 | 1 | 12 | 3808.7875 | -0.0035 |
| 15 | 1 | 15 | 14 | 1 | 14 | 4035.1875 | 0.0061  |
| 15 | 0 | 15 | 14 | 0 | 14 | 4052.8750 | 0.0068  |
| 15 | 2 | 14 | 14 | 2 | 13 | 4058.4750 | -0.0031 |
| 15 | 4 | 12 | 14 | 4 | 11 | 4060.0875 | 0.0231  |
| 15 | 4 | 11 | 14 | 4 | 10 | 4060.0875 | 0.0210  |
| 15 | 3 | 13 | 14 | 3 | 12 | 4060.3500 | -0.0229 |
| 15 | 3 | 12 | 14 | 3 | 11 | 4060.5500 | -0.0122 |
| 15 | 2 | 13 | 14 | 2 | 12 | 4065.1750 | -0.0095 |
| 15 | 1 | 14 | 14 | 1 | 13 | 4080.5875 | -0.0069 |
| 16 | 1 | 16 | 15 | 1 | 15 | 4303.9500 | -0.0108 |
| 16 | 0 | 16 | 15 | 0 | 15 | 4322.1000 | -0.0050 |
| 16 | 2 | 15 | 15 | 2 | 14 | 4328.8625 | -0.0035 |
| 16 | 4 | 13 | 15 | 4 | 12 | 4330.7875 | -0.0053 |
| 16 | 4 | 12 | 15 | 4 | 11 | 4330.7875 | -0.0086 |
| 16 | 3 | 13 | 15 | 3 | 12 | 4331.4000 | -0.0139 |
| 16 | 2 | 14 | 15 | 2 | 13 | 4336.9500 | -0.0135 |
| 16 | 1 | 15 | 15 | 1 | 14 | 4352.3375 | -0.0039 |
| 17 | 1 | 17 | 16 | 1 | 16 | 4572.7125 | 0.0129  |
| 17 | 0 | 17 | 16 | 0 | 16 | 4591.1750 | -0.0015 |
| 17 | 2 | 16 | 16 | 2 | 15 | 4599.2250 | 0.0050  |
| 17 | 5 | 13 | 16 | 5 | 12 | 4601.2875 | 0.0030  |
| 17 | 4 | 13 | 16 | 4 | 12 | 4601.5250 | -0.0123 |
| 17 | 3 | 15 | 16 | 3 | 14 | 4601.9500 | 0.0059  |
| 17 | 3 | 14 | 16 | 3 | 13 | 4602.3250 | 0.0260  |
| 17 | 2 | 15 | 16 | 2 | 14 | 4608.8750 | 0.0035  |
| 18 | 1 | 18 | 17 | 1 | 17 | 4841.4000 | 0.0038  |
| 18 | 0 | 18 | 17 | 0 | 17 | 4860.0625 | -0.0179 |
| 18 | 2 | 17 | 17 | 2 | 16 | 4869.5250 | -0.0125 |
| 18 | 5 | 14 | 17 | 5 | 13 | 4871.9875 | -0.0023 |
| 18 | 4 | 14 | 17 | 4 | 13 | 4872.2750 | -0.0158 |
| 18 | 3 | 16 | 17 | 3 | 15 | 4872.7500 | 0.0018  |
| 18 | 3 | 15 | 17 | 3 | 14 | 4873.2250 | 0.0041  |
| 18 | 2 | 16 | 17 | 2 | 15 | 4880.9125 | 0.0044  |
| 19 | 1 | 19 | 18 | 1 | 18 | 5110.0625 | 0.0128  |
| 19 | 2 | 17 | 18 | 2 | 16 | 5153.0750 | 0.0038  |
| 20 | 2 | 19 | 19 | 2 | 18 | 5410.0875 | 0.0315  |
| 20 | 4 | 17 | 19 | 4 | 16 | 5413.8125 | -0.0103 |

---

---

|    |   |    |    |   |    |           |         |
|----|---|----|----|---|----|-----------|---------|
| 20 | 3 | 18 | 19 | 3 | 17 | 5414.4000 | 0.0096  |
| 20 | 3 | 17 | 19 | 3 | 16 | 5415.1750 | -0.0155 |

---

**Table S7.** Comparison of the structural and energetic results for the two lowest-lying isomers of the 2-adamantanol dimer using B3LYP-D3(BJ), CAM-B3LYP-D3(BJ) and wB97XD (a def2-TZVP basis set as used in all cases). The experimental results correspond to the fit of Table 3.

|                                               | Experiment               |               | Theory                     |                |                  |               |               |                |
|-----------------------------------------------|--------------------------|---------------|----------------------------|----------------|------------------|---------------|---------------|----------------|
|                                               | Isomer A                 | Isomer B      | B3LYP-D3(BJ)               |                | CAM-B3LYP-D3(BJ) |               | wB97XD        |                |
|                                               |                          |               | Isomer 1                   | Isomer 2       | Isomer 1         | Isomer 2      | Isomer 1      | Isomer 2       |
| $A / \text{MHz}^a$                            | 701.117(17) <sup>c</sup> | 702.79(27)    | 703.95[0.40%] <sup>d</sup> | 702.74[-0.01%] | 711.22[1.44%]    | 709.01[0.89%] | 700.34[-0.11] | 697.27[-0.79%] |
| $B / \text{MHz}$                              | 138.34738(18)            | 136.84142(21) | 140.03[1.22%]              | 139.42[1.88%]  | 139.85[1.09%]    | 141.61[3.49%] | 144.51[4.46]  | 146.28[6.90%]  |
| $C / \text{MHz}$                              | 135.18537(18)            | 133.80126(23) | 136.84[1.22%]              | 136.13[1.74%]  | 136.776[1.18%]   | 138.42[3.45%] | 140.97[4.48%] | 142.52[6.52%]  |
| $\kappa$                                      | -0.9888(4)               | -0.9893(8)    | -0.9890                    | -0.9880        | -0.9893          | -0.9888       | -0.9873       | -0.9864        |
| $D_J / \text{kHz}$                            | 0.00643(18)              | 0.00471(23)   | 0.0063                     | 0.0045         | 0.0068           | 0.0066        | 0.0038        | 0.0037         |
| $D_{JK} / \text{kHz}$                         | -0.0169(54)              |               | -0.0150                    | 0.0142         | -0.0192          | -0.0115       | -0.0060       | -0.0029        |
| $D_K / \text{kHz}$                            |                          |               | 0.0532                     | 0.0104         | 0.0605           | 0.0438        | 0.0300        | 0.0237         |
| $d_1 / \text{kHz}$                            |                          |               | -0.0003                    | -0.0002        | -0.0004          | -0.0004       | -0.0002       | -0.0002        |
| $d_2 / \text{kHz}$                            |                          |               | 0.0000                     | 0.0000         | 0.000            | 0.0000        | 0.0000        | 0.0000         |
| $ \mu_a  / \text{D}$                          |                          |               | 3.12                       | 2.66           | 3.16             | 2.66          | 3.09          | 2.50           |
| $ \mu_b  / \text{D}$                          |                          |               | 0.23                       | 0.31           | 0.22             | 0.68          | 0.24          | 0.77           |
| $ \mu_c  / \text{D}$                          |                          |               | 1.10                       | 1.21           | 1.15             | 0.85          | 1.19          | 0.77           |
| $\Delta E_{ZPE} / \text{kJ mol}^{-1b}$        |                          |               | 0.00                       | 0.00           | 0.00             | 1.75          | 0.00          | 0.59           |
| $\Delta G_{298\text{K}} / \text{kJ mol}^{-1}$ |                          |               | 0.97                       | 0.00           | 0.00             | 1.94          | 0.00          | 0.12           |

<sup>a</sup>Rotational constants ( $A, B, C$ ), Ray's asymmetry parameter ( $\kappa = (2B-A-C)/(A-C)$ ), Watson's S-reduction centrifugal distortion constants ( $D_J, D_{JK}, D_K, d_1, d_2$ ) and electric dipole moments ( $\mu_\alpha, \alpha = a, b, c$ ). <sup>b</sup>Relative electronic energy with zero-point correction ( $\Delta E_{ZPE}$ ) and Gibbs energy ( $\Delta G, 298\text{K}, 1 \text{ atm}$ ). <sup>c</sup>Standard errors in parentheses in units of the last digit. <sup>d</sup>Relative differences with the experimental rotational constants.

**Table S8.** Relative intensity measurements for a set of  $^aR$  rotational transitions of isomers 1 and 2 of the 2-adamantanol dimer. The population ratio was calculated with the B3LYP-D3(BJ) electric dipole moments of Table 3.

| $J'$               | $K_{-1}'$ | $K_{+1}'$ | $J''$ | $K_{-1}''$ | $K_{+1}''$ | Intensity<br>isomer 1<br>/ a.u. | Intensity<br>isomer 2<br>/ a.u. | Population<br>Ratio<br>1 : 2 |
|--------------------|-----------|-----------|-------|------------|------------|---------------------------------|---------------------------------|------------------------------|
| 10                 | 0         | 10        | 9     | 0          | 9          | 0.000246                        | 0.000086                        | 2.44                         |
| 10                 | 1         | 10        | 9     | 1          | 9          | 0.000245                        | 0.000068                        | 3.08                         |
| 10                 | 1         | 9         | 9     | 1          | 8          | 0.000233                        | 0.000081                        | 2.44                         |
| 9                  | 0         | 9         | 8     | 0          | 8          | 0.000285                        | 0.000071                        | 3.45                         |
| 11                 | 0         | 11        | 10    | 0          | 10         | 0.000338                        | 0.000091                        | 3.17                         |
| 11                 | 1         | 11        | 10    | 1          | 10         | 0.000238                        | 0.000106                        | 1.91                         |
| 11                 | 1         | 10        | 10    | 1          | 9          | 0.000331                        | 0.000080                        | 3.53                         |
| 12                 | 0         | 12        | 11    | 0          | 11         | 0.000219                        | 0.000095                        | 1.97                         |
| 13                 | 0         | 13        | 12    | 0          | 12         | 0.000245                        | 0.000105                        | 1.99                         |
| 13                 | 1         | 13        | 12    | 1          | 12         | 0.000293                        | 0.000101                        | 2.47                         |
| 13                 | 1         | 12        | 12    | 1          | 11         | 0.000347                        | 0.000096                        | 3.08                         |
| Average            |           |           |       |            |            |                                 |                                 | 2.3                          |
| Standard deviation |           |           |       |            |            |                                 |                                 | 0.5                          |

**Table S9.** Atomic coordinates for isomer 1 of the 2-adamantanol dimer in the principal inertial axes system (B3LYP-D3(BJ)/def2-TZVP).

|    | Atom | <i>a</i> | <i>b</i> | <i>c</i> |
|----|------|----------|----------|----------|
| 1  | O    | 1.2283   | 1.6767   | -0.6945  |
| 2  | C    | 2.0643   | 0.0972   | 0.9119   |
| 3  | C    | 3.5987   | 1.0205   | -0.8426  |
| 4  | C    | 4.4994   | -0.5242  | 0.9182   |
| 5  | C    | 2.9800   | -1.4104  | -0.8746  |
| 6  | C    | 2.3991   | 1.3248   | 0.0632   |
| 7  | C    | 3.2783   | -0.2211  | 1.7981   |
| 8  | C    | 1.7599   | -1.1053  | 0.0060   |
| 9  | C    | 4.8097   | 0.7029   | 0.0487   |
| 10 | C    | 3.2874   | -0.1826  | -1.7443  |
| 11 | C    | 4.1917   | -1.7268  | 0.0138   |
| 12 | H    | 1.1988   | 0.3304   | 1.5351   |
| 13 | H    | 3.8156   | 1.9026   | -1.4558  |
| 14 | H    | 5.3611   | -0.7494  | 1.5519   |
| 15 | H    | 2.7620   | -2.2670  | -1.5176  |
| 16 | H    | 2.6483   | 2.1605   | 0.7282   |
| 17 | H    | 3.4924   | 0.6205   | 2.4632   |
| 18 | H    | 3.0485   | -1.0799  | 2.4342   |
| 19 | H    | 1.5135   | -1.9720  | 0.6257   |
| 20 | H    | 0.8902   | -0.8980  | -0.6178  |
| 21 | H    | 5.0489   | 1.5618   | 0.6827   |
| 22 | H    | 5.6861   | 0.5128   | -0.5766  |
| 23 | H    | 2.4355   | 0.0412   | -2.3891  |
| 24 | H    | 4.1438   | -0.3829  | -2.3943  |
| 25 | H    | 3.9871   | -2.6106  | 0.6251   |
| 26 | H    | 5.0619   | -1.9604  | -0.6069  |
| 27 | H    | 1.4247   | 2.4521   | -1.2315  |
| 28 | O    | -1.2176  | 1.6185   | 0.7946   |
| 29 | C    | -3.0085  | 0.1564   | 1.4330   |
| 30 | C    | -2.0136  | -0.0246  | -0.8599  |
| 31 | C    | -3.7810  | -1.6499  | -0.1318  |
| 32 | C    | -4.3832  | 0.7481   | -0.5814  |
| 33 | C    | -1.7227  | 0.3035   | 0.6147   |
| 34 | C    | -3.4920  | -1.2977  | 1.3348   |
| 35 | C    | -4.0902  | 1.0981   | 0.8850   |
| 36 | C    | -2.4951  | -1.4795  | -0.9538  |
| 37 | C    | -3.0966  | 0.9177   | -1.4022  |
| 38 | C    | -4.8641  | -0.7074  | -0.6779  |

---

|    |   |         |         |         |
|----|---|---------|---------|---------|
| 39 | H | -2.7851 | 0.4110  | 2.4720  |
| 40 | H | -1.0912 | 0.1008  | -1.4343 |
| 41 | H | -4.1255 | -2.6856 | -0.1997 |
| 42 | H | -5.1569 | 1.4159  | -0.9705 |
| 43 | H | -0.9904 | -0.4246 | 0.9918  |
| 44 | H | -2.7357 | -1.9764 | 1.7409  |
| 45 | H | -4.3954 | -1.4281 | 1.9376  |
| 46 | H | -5.0003 | 1.0000  | 1.4846  |
| 47 | H | -3.7533 | 2.1325  | 0.9660  |
| 48 | H | -1.7203 | -2.1577 | -0.5827 |
| 49 | H | -2.6778 | -1.7444 | -1.9995 |
| 50 | H | -2.7506 | 1.9513  | -1.3450 |
| 51 | H | -3.2874 | 0.6927  | -2.4561 |
| 52 | H | -5.7904 | -0.8347 | -0.1092 |
| 53 | H | -5.0891 | -0.9604 | -1.7187 |
| 54 | H | -0.4036 | 1.7054  | 0.2712  |

---

**Table S10.** Atomic coordinates for isomer 2 of the 2-adamantanol dimer in the principal inertial axes system (B3LYP-D3(BJ)/def2-TZVP).

|    | Atom | <i>a</i> | <i>b</i> | <i>c</i> |
|----|------|----------|----------|----------|
| 1  | O    | -1.2680  | 1.7273   | 0.6524   |
| 2  | C    | -1.9542  | -0.0847  | -0.7731  |
| 3  | C    | -3.6630  | 1.1481   | 0.5861   |
| 4  | C    | -4.3922  | -0.6489  | -1.0065  |
| 5  | C    | -3.1564  | -1.2554  | 1.0944   |
| 6  | C    | -2.3454  | 1.2731   | -0.1880  |
| 7  | C    | -3.0557  | -0.5205  | -1.7514  |
| 8  | C    | -1.8213  | -1.1257  | 0.3479   |
| 9  | C    | -4.7609  | 0.7112   | -0.3964  |
| 10 | C    | -3.5221  | 0.1057   | 1.7046   |
| 11 | C    | -4.2550  | -1.6905  | 0.1140   |
| 12 | H    | -1.0052  | 0.0239   | -1.3009  |
| 13 | H    | -3.9202  | 2.1242   | 1.0133   |
| 14 | H    | -5.1735  | -0.9587  | -1.7053  |
| 15 | H    | -3.0602  | -1.9977  | 1.8909   |
| 16 | H    | -2.4723  | 1.9908   | -1.0075  |
| 17 | H    | -3.1464  | 0.2035   | -2.5665  |
| 18 | H    | -2.7819  | -1.4772  | -2.2036  |
| 19 | H    | -1.5329  | -2.0876  | -0.0843  |
| 20 | H    | -1.0301  | -0.8349  | 1.0392   |
| 21 | H    | -4.8801  | 1.4579   | -1.1872  |
| 22 | H    | -5.7179  | 0.6449   | 0.1281   |
| 23 | H    | -2.7519  | 0.4161   | 2.4132   |
| 24 | H    | -4.4632  | 0.0336   | 2.2572   |
| 25 | H    | -4.0100  | -2.6674  | -0.3130  |
| 26 | H    | -5.2076  | -1.8004  | 0.6410   |
| 27 | H    | -1.5107  | 2.5798   | 1.0306   |
| 28 | O    | 1.2112   | 1.6093   | -0.7686  |
| 29 | C    | 2.0043   | -0.0846  | 0.8370   |
| 30 | C    | 3.5584   | 1.1265   | -0.7098  |
| 31 | C    | 4.4787   | -0.4783  | 0.9891   |
| 32 | C    | 3.1853   | -1.3409  | -0.9839  |
| 33 | C    | 2.2685   | 1.2441   | 0.1073   |
| 34 | C    | 3.1744   | -0.3656  | 1.7914   |
| 35 | C    | 1.8822   | -1.2270  | -0.1800  |
| 36 | C    | 4.7271   | 0.8417   | 0.2447   |
| 37 | C    | 3.4320   | -0.0185  | -1.7251  |
| 38 | C    | 4.3544   | -1.6219  | -0.0284  |

---

|    |   |        |         |         |
|----|---|--------|---------|---------|
| 39 | H | 1.0760 | 0.0094  | 1.4075  |
| 40 | H | 3.7202 | 2.0717  | -1.2338 |
| 41 | H | 5.3115 | -0.6789 | 1.6690  |
| 42 | H | 3.0993 | -2.1564 | -1.7074 |
| 43 | H | 2.4055 | 2.0323  | 0.8622  |
| 44 | H | 3.2584 | 0.4359  | 2.5319  |
| 45 | H | 2.9892 | -1.2920 | 2.3430  |
| 46 | H | 1.6745 | -2.1657 | 0.3426  |
| 47 | H | 1.0456 | -1.0383 | -0.8538 |
| 48 | H | 4.8387 | 1.6608  | 0.9617  |
| 49 | H | 5.6608 | 0.7837  | -0.3221 |
| 50 | H | 2.6103 | 0.1877  | -2.4125 |
| 51 | H | 4.3488 | -0.0850 | -2.3188 |
| 52 | H | 4.1933 | -2.5704 | 0.4934  |
| 53 | H | 5.2859 | -1.7209 | -0.5943 |
| 54 | H | 0.3938 | 1.6923  | -0.2494 |

---
